# Supplementary material for: Modeling Gastrointestinal Tract Wet Pool Size in Small Ruminants
Source: MDPI journal article supplement (doi:10.3390/ani13182909), 2023-09-13
Supplement: s1 [file s1]

*Supplementary Material*

# Modeling gastrointestinal tract wet pool size in small ruminants

**Paola R. Ribeiro<sup>1</sup>, Marcelo Gindri<sup>2</sup>, Gilberto L. Macedo Junior<sup>3</sup>, Caio J. L. Herbster<sup>4</sup>, Elzania S. Pereira<sup>4</sup>, Bruno Biagioli<sup>1</sup>, and Isabelle A. M. A. Teixeira<sup>1,5,\*</sup>**

<sup>1</sup> Department of Animal Science, São Paulo State University, Jaboticabal 14884900, SP, Brazil; paola.rezenderibeiro@gmail.com (P.R.R.); bruno.biagioli@unesp.br (B.B.)

<sup>2</sup> UMR Modélisation Systémique Appliquée aux Ruminants, AgroParisTech, INRAE, Université Paris-Saclay, 91120, Palaiseau, France; gindri.marcelo@gmail.com

<sup>3</sup> Department of Animal Science, Federal University of Uberlândia, Uberlândia 38402018, MG, Brazil; gilberto.macedo@ufu.br

<sup>4</sup> Department of Animal Science, Federal University of Ceará, Fortaleza 60356000, CE, Brazil; julioherbster@gmail.com (C.J.L.H.); elzania@hotmail.com (E.S.P.)

<sup>5</sup> Department of Animal Veterinary, and Food Sciences, University of Idaho, Twin Falls, ID 83301, USA

\* Correspondence: izabelle@uidaho.edu

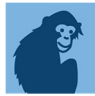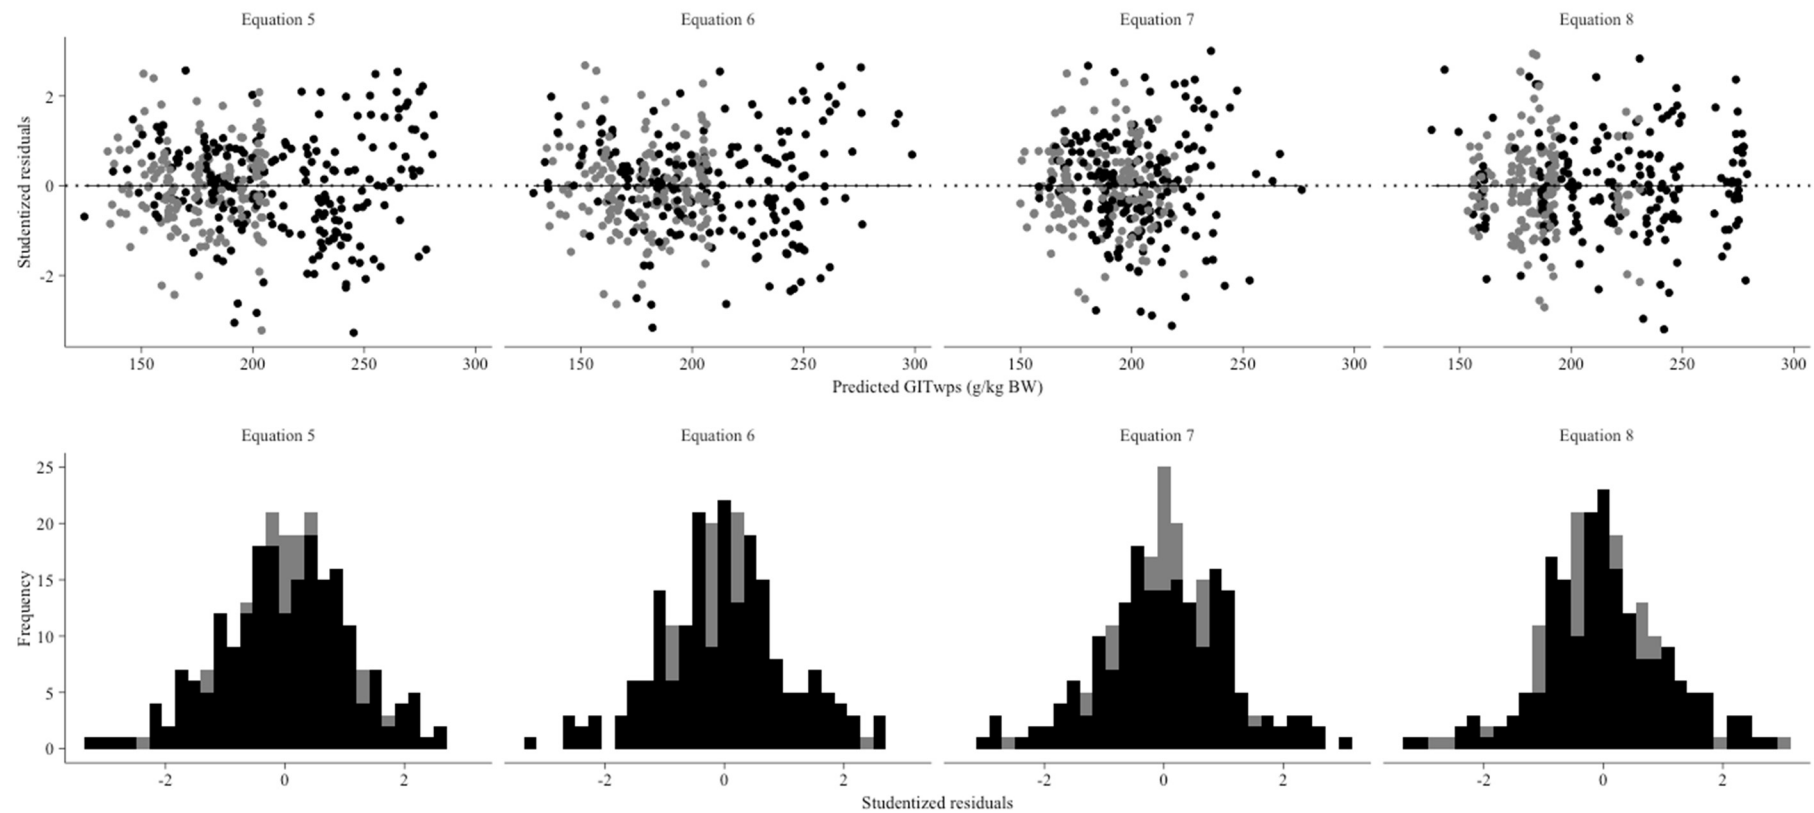

**Figure S1:** Studentized residuals of the linear equations proposed to describe the gastrointestinal tract wet pool size (GITwps) of small ruminants. Goats are grey and sheep are black.

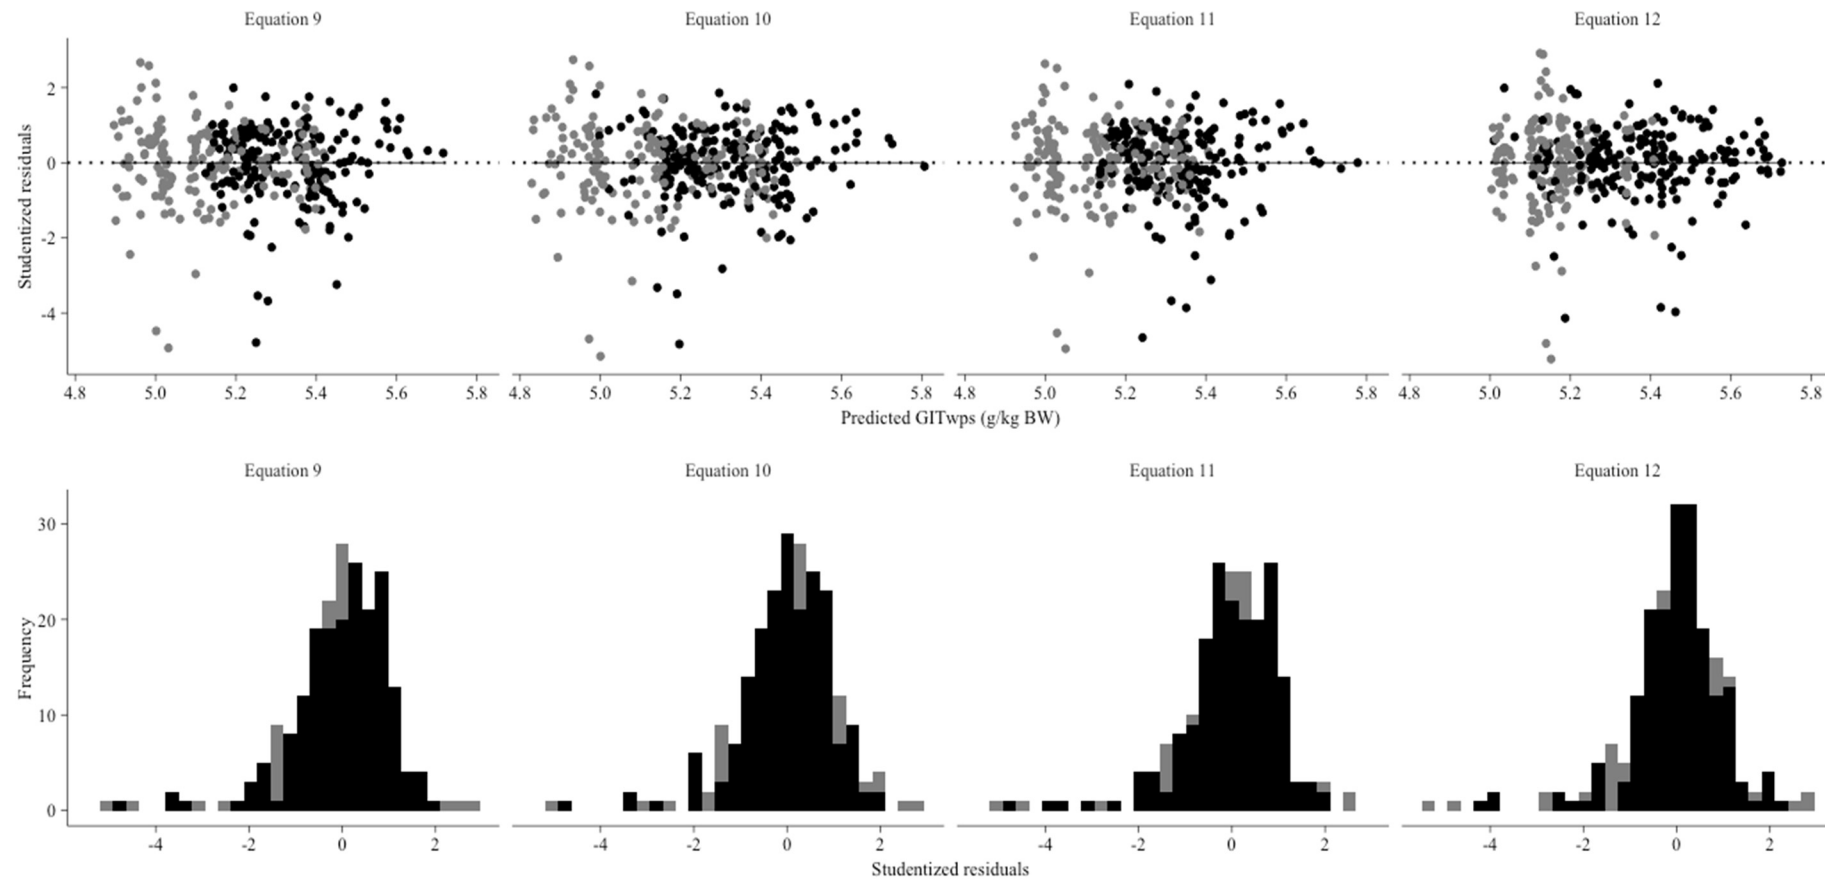

**Figure S2:** Studentized residuals of the non-linear equations proposed to describe gastrointestinal tract wet pool size (GITwps) of small ruminants. Goats are grey and sheep are black.
